# Supplementary material for: Novel preparation of β,β′-connected porphyrin dimersElectronic supplementary information (ESI) available: experimental procedures employed in Scheme 1, ORTEP drawing of 3 and a ball and stick model of 3 showing hydrogen bonding. See http://www.rsc.org/suppdata/cc/b1/b108819j
Source: Royal Society of Chemistry journal article supplement (doi:10.1039/b108819j), 2002-01-07

# Experimental Procedures in Scheme 1

**General**

Melting points are uncorrected. NMR spectra were obtained with a JEOL GSX-270 or JNM-400 spectrometer at ambient temperature by using CDCl3 as a solvent and tetramethylsilane as an internal standard. Mass spectra were measured with a Hitachi M80B spectrometer under the EI conditions: (EI: 20 eV; high boiling perfluorokerosine as a standard), with JEOL JMS-LX2000 under FAB conditions (nitrobenzyl alcohol as matrix), or Voyager System 6194 under MALDI-TOF conditions. X-ray measurements were made at 25 ˚C on a Rigaku AFC5R diffractometer with graphite monochromated Mo *K* radiation and a 12 kW rotating anode generator. Column chromatography and TLC analyses were carried out using C-200 (Wakogel) and Kieselgel 60 F254 (Merk), respectively. Ether and THF were freshly distilled from sodium benzophenone ketyl. Dichloromethane was distilled from CaH2 under an inert atmosphere. DBU was distilled from CaH2 under an inert atmosphere. Other commercially available materials were used without further purification.

**Ethyl (*E*)-4-(2-nitropropenyl)-3-methylpyrrole-2-carboxylate (2)**

Ethyl 4-formyl-3-methylpyrrole-2-carboxylate (**1**; 0.18 g, 1.0 mmol)1 and ammonium acetate (0.085 g, 1.1 mmol) in nitroethane (10 mL) were refluxed overnight and then the cooled mixture was diluted with CHCl3 (*ca*. 50 mL). The chloroform solution was washed with water (20 mL) and brine (20 mL), dried over sodium sulfate and concentrated. The residual solid was recrystallised from EtOAc/hexane to give 0.23 g (97%) of **2** as yellow crystals: (Found: C, 55.5; H, 5.9; N, 11.8. C11H14N2O4 requires C, 55.5; H, 5.9; N, 11.8%); mp 165—168 ˚C; *m/z* (EI, rel. intensity) 238 (M+, 50), 162 (13) and 135 (100); **max (KBr) 3262, 1673, 1645, 1512, 1288 and 779 cm–1; **H (270 MHz) 1.40 (3 H, t, *J* = 7.3), 2.43 (3 H, s), 2.44 (3 H, s), 4.37 (2 H, q, *J* = 7.3), 7.16 (1 H, d, *J* = 3.4, H5), 8.08 (1 H, s, vinyl) and 9.25 (1 H, br-s, NH); **C (67.8 MHz) 10.2, 14.3, 14.4, 60.7, 118.0, 121.0, 123.4, 126.2, 128.9, 143.5 and 161.5.

**Diethyl 4,4’-dimethyl-3,3’-bipyrrole-2,5’-dicarboxylate (3)**

To a stirred solution of **2** (0.23 g, 1.0 mmol) and ethyl isocyanoacetate (0.11 mL, 1 mmol) in dry THF (20 mL) was slowly added DBU (0.15 mL, 1 mmol) at 0 ˚C under a nitrogen atmosphere. After the addition, the cooling bath was removed and the mixture was stirred overnight. The reaction was quenched by addition of a 5%-HCl solution (20 mL) and the mixture was extracted with EtOAc (3 x 20 mL). The organic phase was washed with water (30 mL) and brine (30 mL), dried over sodium sulfate and concentrated. The residual solid was purified by chromatography on silica gel (EtOAc:hexane = 3:7) followed by recrystallisation from EtOAc/hexane to give 0.14 g (46%) of **3** as pale yellow crystals: (Found: C, 62.9; H, 6.6; N, 9.1. C16H20N2O4 requires C, 63.1; H, 6.6; N, 9.2%); mp 136—138 ˚C; *m/z* (FAB–, rel. intensity) 304 (M–, 100), 259 (65), 231 (14) and 213 (21); **max (KBr) 3309, 1666 and 1126 cm–1; **H (270 MHz) 1.19 (3 H, t, *J* = 7.1), 1.37 (3 H, t, *J* = 7.1), 1.94 (3 H, s), 2.17 (3 H, s), 4.18 (2 H, q, *J* = 7.1), 4.34 (2 H, q, *J* = 7.1), 6.79 (1 H, d, *J* = 2.9), 6.83 (1 H, d, *J* = 3.4) and 8.97 (2 H, br, NH); **C (67.8 MHz) 10.3, 11.3, 14.1, 14.5, 59.8, 119.0, 119.1, 119.9, 120.4, 121.4, 121.8, 123.4, 127.6, 161.3 and 162.1.

5,5’-Methylenebis(3,4-dimethylpyrrole-2-carbaldehyde) (7)

A solution of ethyl 3,4-diethylpyrrole-2-carboxylate (3.90 g, 20 mmol),2 dimethoxymethane (8.80 g, 100 mmol) and *p*-toluenesulfonic acid (0.38 g, 2 mmol) in CH2Cl2 (40 mL) was refluxed overnight. Water (50 mL) was added and the organic phase was separated. The aqueous phase was extracted with CHCl3 (3 x 20 mL). The combined organic phase was washed with water (50 mL) and brine (50 mL), dried over sodium sulfate and concentrated. The residue was chromatographed on silica gel (EtOAc:hexane = 2:8) and then recrystallised from hexane to give 3.14 g (78%) of diethyl 5,5’-methylenebis(3,4-diethylpyrrole-2-carboxylate) as colorless crystals: (Found: C, 68.6; H, 8.5; N, 6.8. C23H32N2O4 requires C, 68.6; H, 8.5; N, 7.0%); mp 104 ˚C; *m/z* (rel. intensity) 402 (M+, 55), 357 (7), 327 (7) and 207 (100);**max (KBr) 3336, 1697, 1655 and 1444 cm–1; **H (270 MHz) 1.06 (6 H, t, *J* = 7.3), 1.15 (6 H, t, *J* = 7.3), 1.28 (6 H, t, *J* = 7.1), 2.43 (4 H, q, *J* = 7.3), 2.71 (4 H, q, *J* = 7.3), 3.90 (2 H, s), 4.24 (4 H, q, *J* = 7.1) and 9.50 (2 H, br, NH); **C (67.8 MHz) 14.3, 15.8, 16.1, 17.1, 18.4, 22.9, 59.8, 117.1, 123.3, 129.4, 133.7 and 161.8. A mixture of the dicarboxylic acid ester (2.00 g, 5.0 mmol), KOH (0.32 g) and ethylene glycol (40 mL) was protected from light and heated at 170 ˚C for 2 h under an argon atmosphere. Water (50 mL) was added and the mixture was extracted with CHCl3 (3 x 30 mL). The organic extract was washed with water (40 mL) and brine (40 mL), dried over sodium sulfate and concentrated. The residue was dissolved in CHCl3 and passed through a short silica-gel column. The eluate was concentrated to give air-sensitive 2,2’-methylenebis(3,4-diethylpyrrole) as pale yellow oil, which was used in the next step without further purification. This material was protected from light and dissolved in trifluoroacetic acid (3 mL) at 0 ˚C under an argon atmosphere. After 10 min, methyl orthoformate (5 mL) was slowly added and the mixture was stirred at the temperature for 2 h. The mixture was neutralised with 2 M aq-NaOH and diluted with water (30 mL) with cooling. The precipitates were filtered, dried *in vacuo* and recrystallised from hexane to give 0.64 g (85%) of **7** as pale brown crystals: (Found: C, 71.8; H, 8.2; N, 8.6. C19H26N2O2 requires C, 72.6; H, 8.3; N, 8.9%); mp 189 ˚C; *m/z* (rel. intensity) 314 (M+, 70), 299 (26), 285 (54), 163 (100) and 149 (56);**max (KBr) 3224, 1645, 1616 and 1440 cm–1; **H (270 MHz) 1.09 (6 H, t, *J* = 7.6), 1.24 (6 H, t, *J* = 7.6), 2.47 (4 H, q, *J* = 7.6), 2.72 (4 H, q, *J* = 7.6), 3.96 (2 H, s), 9.49 (2 H, s, CHO) and 10.43 (2 H, br, NH); **C (67.8 MHz) 15.9, 16.9, 17.2, 17.7, 22.7, 124.1, 128.0, 135.1, 139.2 and 176.8.

7,18’-Dibutyl-12,13,17,18,7’,8’,12’,13’-octaethyl-3,8,3’,17’-tetramethyl-2,2’-biporphynato-dizinc(II) (8a)

To a solution of **3** (0.60 g, 2.0 mmol) and *t*-butyl 5-acetoxymethyl-4-butyl-3-methylpyrrole-2-carboxylate (**4**; 1.20 g, 4.0 mmol)3 in acetic acid (50 mL) was added *p*-toluenesulfonic acid (0.20 g, 1.0 mmol). After being stirred for 2 h at room temperature, the mixture was poured into water (100 mL) and extracted with CHCl3 (3 x 30 mL). The organic phase was washed with water (50 mL), saturated aq-NaHCO3 (3 x 30 mL) and brine (50 mL), dried over sodium sulfate and concentrated. The residue was chromatographed on silica gel (EtOAc:hexane = 2:8) to give 1.10 g (68%) of diethyl 5,1’-bis(5-*t*-butoxycarbonyl-3-butyl-4-pyrrol-2-ylmethyl)-4,4’-dimethyl-3,3’-bipyrrole-1,5’-dicarboxylate (**5**) as pale yellow viscous oil: MS *m/z* (rel. intensity) 802 (M+, 5), 747 (82), 704 (50), 647 (100) and 604 (55); **H (270 MHz) 0.88 (3 H, t, *J* = 6.8, CH2CH2CH2C*H3*), 0.90 (3 H, t, *J* = 6.8, CH2CH2CH2C*H3*), 1.16 (3 H, t, *J* = 7.1, 2-OCH2C*H3*), 1.2—1.4 (8 H, m, 2 x CH2C*H2*C*H2*CH3), 1.33 (3 H, t, *J* = 7.1, 5’-OCH2C*H3*), 1.52 (9 H, s, *t*-Bu), 1.54 (9 H, s, *t*-Bu), 1.79 (3 H, s, 4-Me), 2.10 (3 H, s, 4’-Me), 2.21 (3 H, s, Me), 2.27 (3 H, s, Me), 2.32 (2 H, m, C*H2*CH2CH2CH3), 2.40 (2 H, m, C*H2*CH2CH2CH3), 3.69 (2 H, m, 2’-CH2), 3.91 (2 H, m, 5-CH2), 4.18 (2 H, m, 2-OC*H2*CH3), 4.29 (2 H, m, 5’-OC*H2*CH3), 8.70 (1 H, br, NH), 8.77 (1 H, br, NH), 8.87 (1 H, br, NH) and 9.04 (1 H, br, NH). Potassium hydroxide (0.5 g) and ethylene glycol (50 mL) was added to the material, the vessel was filled with argon and then the mixture was heated at 170 ˚C for 2 h in dark. After being cooled, the mixture was diluted with water (50 mL) and extracted with CHCl3 (3 x 30 mL). The organic phase was washed with water (50 mL) and brine (50 mL), dried over sodium sulfate and concentrated. The residue was dissolved in CHCl3 and passed through a short silica gel column to give crude 1,5’-bis(3-butyl-4-pyrrol-2-ylmethyl)-4,4’-dimethyl-3,3’-bipyrrole (**6**): **H (270 MHz) 0.89 (3 H, t, *J* = 6.8), 0.92 (3 H, t, *J* = 6.8), 1.2—1.5 (8 H, m), 1.95 (3 H, s), 1.98 (3 H, s), 2.01 (3 H, s), 2.05 (3 H, s), 2.3—2.5 (4 H, m), 3.70 (2 H, m), 3.80 (2 H, s), 6.22 (1 H, m), 6.31 (1 H, m), 6.36 (2 H, m), 7.17 (1 H, br, NH), 7.24 (1 H, br, NH), 7.34 (1 H, br, NH) and 7.39 (1 H, br, NH). This crude material and **7** (0.57 g, 1.80 mmol) were dissolved in a mixture of CH2Cl2­ (100 mL) and methanol (3.5 mL) and protected from light. This solution was added to a solution of *p*-toluenesulfonic acid (0.60 g) in a mixture of CH2Cl2­ (100 mL) and methanol (3.5 mL) at room temperature for 2 h under argon. After the mixture was stirred overnight, a saturated methanolic solution of zinc(II) acetate (20 mL) was added and the mixture was further stirred for 1 day under air. The mixture was washed with water (50 mL) and brine (50 mL), dried over sodium sulfate and concentrated. The crude material was purified by chromatography on silica gel (CHCl3) followed by recrystallisation from EtOAc/hexane to give 0.10 g (10%) of pure **8a** as dark red needles (Found: C, 71.1; H, 7.0; N, 9.7. C68H78N8Zn2·1/2H2O requires C, 71.2; H, 6.9; N, 9.8%.), mp >250 ˚C; FAB MS *m/z* (rel. intensity) 1142.5 (30), 1141.5 (45), 1140.5 (65), 1139.5 (75), 1138.5 (100), 1137.5 (95), 1136.5 (99), 1135.5 (75) and 1134.5 (79); **max ( in CH2Cl2) 404 (3.2 x 105), 535 (3.2 x 104) and 579 (5.0 x 104) nm; **H (400 MHz) 0.09 (3 H, t, *J* = 7.3, 18’-CH2CH2CH2C*H3*), 0.82 (2 H, m, 18’-CH2CH2C*H*2CH3), 1.15 (3 H, t, *J* = 7.3, 18-CH2C*H*3), 1.22 (3 H, t, *J* = 7.3, 7-CH2CH2CH2C*H*3), 1.54 (1 H, m, 18’-CH2C*H*2CH2CH3), 1.65 (1 H, m, 18’-CH2C*H*2CH2CH3), 1.81 (3 H, t, *J* = 7.3), 1.85—2.0 (14 H, m), 2.00 (3 H, t, *J* = 7.3), 2.07 (3 H, t, *J* = 7.3), 2.43 (2 H, m, 7-CH2C*H2* CH2CH3), 3.26 (2 H, br t, *J* = 7.0, 18’-C*H2*CH2CH2CH3), 3.33 (2 H, q, *J* = 7.3, 18-C*H2*CH3), 3.43 (3 H, s, 3- or 3’-Me), 3.67 (3 H, s, 3- or 3’-Me), 3.93 (2H, m), 3.96 (3 H, s), 4.02 (3 H, s), 4.0—4.3 (14 H, m), 10.00 (1 H, s), 10.07 (1 H, s), 10.10 (1 H, s), 10.13 (1 H, s), 10.20 (1 H, s), 10.22 (1 H, s), 10.51 (1 H, s) and 10.59 (1 H, s); **C (100 MHz, 50 ˚C) 11.6 (3- or 3’-Me), 11.8 (3- or 3’-Me),13.2 (18’-CH2CH2CH2*C*H­3), 13.5 (8- or 17’-Me), 13.6 (8- or 17’-Me), 14.3 (7-CH2CH2CH2*C*H3), 17.9 (18-CH2*C*H­3), 18.4 (CH2*C*H3), 18.5 (4 x CH2*C*H3), 18.6 (CH2*C*H3), 18.7 (CH2*C*H3), 19.3 (18-*C*H2CH3), 19.7 (*C*H2CH3), 19.8 (4 x *C*H2CH3), 20.0 (*C*H2CH3), 20.0 (*C*H2CH3), 22.4 (18’-CH2CH2*C*H2CH3), 23.3 (7-CH2CH2*C*H2CH3), 25.8 (18’-CH2*C*H2CH2CH3), 26.5 (7-CH2*C*H2CH2CH3), 34.9 (18’-*C*H2CH2CH2CH3), 35.7 (7-*C*H2CH2CH2CH3), 97.2 (*meso*), 97.3 (*meso*), 97.4 (*meso*), 97.5 (*meso*), 98.3 (*meso*), 98.4 (*meso*), 101.8 (*meso*), 101.8 (*meso*), 136.0 (C3 or C3’), 136.3 (C3 or C3’), 137.1 (C8 and C17’), 140.4 (C2 or C2’), 140.5 (C2 or C2’), 141.8 (), 142.2 (2 x ), 142.3 (), 142.4 (), 142.5 (3 x ), 142.6 (), 142.9 (), 147.5 (), 147.7 (), 147.8 (), 147.9 (), 147.9 (),148.0 (), 148.1 (), 148.2 (2 x ), 148.6 (2 x ), 148.6 (), 148.9 (), 149.0, (), 149.4 () and 149.5 ().

7,18’-Dibutyl-12,13,17,18,7’,8’,12’,13’-octaethyl-3,8,3’,17’-tetramethyl-2,2’-bi-21*H*,23*H*-porphine (8b)

To a solution of zinc complex **8a** (0.10 g, 0.09 mmol) in acetic acid (5 mL) was added trifluoroacetic acid (3 mL) and the mixture was stirred for 2 h at room temperature. Water (20 mL) and saturated aq-NaHCO3 (30 mL) were added and the mixture was extracted with CHCl3 (3 x 30 mL). The organic phase was washed with water (30 mL) and brine (30 mL), dried over sodium sulfate and concentrated. The residue was recrystallised from EtOAc/hexane to give 0.08 g (0.09 mmol) of **8b** as dark red crystals: MALDI-TOF MS *m/z* (rel. intensity) 1014.0 (18), 1013.0 (40), 1012.0 (100) and 1011.0 (88); **max ( in CH2Cl2) 413 (1.6 x 105), 502 (2.0 x 104), 542 (2.0 x 104), 569 (1.6 x 104) and 622 (6.3 x 103) nm; **H (270 MHz) –3.37 (4 H, br-s, NH), 0.17 (3 H, t, *J* = 7.3, 18’-CH2CH2CH2C*H3*), 0.85 (2 H, m, 18’-CH2CH2C*H*2CH3), 1.13 (3 H, t, *J* = 7.6, 18-CH2C*H*3), 1.20 (3 H, t, *J* = 7.3, 7-CH2CH2CH2C*H*3), 1.4—1.6 (2 H, m, 18’-CH2C*H*2CH2CH3), 1.81 (3 H, t, *J* = 7.3), 1.85—2.1 (20 H, m), 2.44 (2 H, m, 7-CH2C*H2* CH2CH3), 3.29 (2 H, br t, *J* = 7.0, 18’-C*H2*CH2CH2CH3), 3.34 (2 H, q, *J* = 7.6, 18-C*H2*CH3), 3.52 (3 H, s, 3- or 3’-Me), 3.79 (3 H, s, 3- or 3’-Me), 3.87 (3 H, s), 3.90 (3 H, s), 3.99 (2H, m), 4.0—4.4 (14 H, m), 10.11 (1 H, s), 10.13 (1 H, s), 10.20 (2 H, m), 10.22 (1 H, s), 10.24 (1 H, s), 10.52 (1 H, s), and 10.55 (1 H, s).

#### References

1. Y. Fumoto, H. Uno, S. Ito, Y. Tsugumi, M. Sasaki, Y. Kitawaki and N. Ono, *J. Chem. Soc., Perkin Trans. 1*, 2000, 2977.
2. N. Ono, H. Kawamura, M. Bougauchi and K. Maruyama, Tetrahedron, 1990, **46**, 7483.
3. P. S. Clezy and A. J. Liepa, *Aust. J. Chem*., 1970, **23**, 2443.


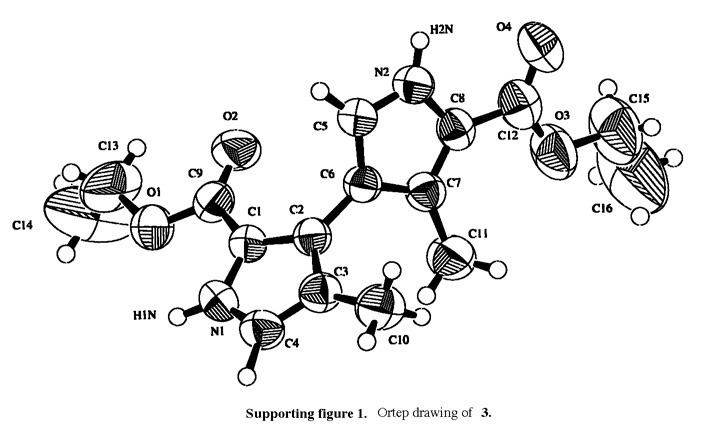


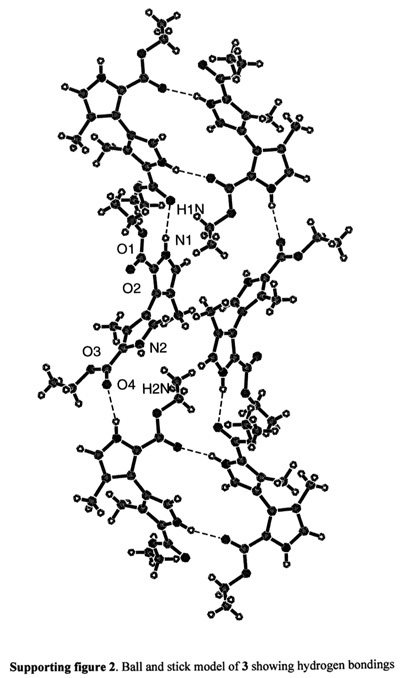

Supplement: b108819j.doc [file b108819j.doc]
